# Supplementary material for: Lead Time and Prognostic Role of Serum CEA, CA19-9, IL-6, CRP, and YKL-40 after Adjuvant Chemotherapy in Colorectal Cancer
Source: MDPI journal article supplement (doi:10.3390/cancers13153892), 2021-08-02
Supplement: s1 [file s1]

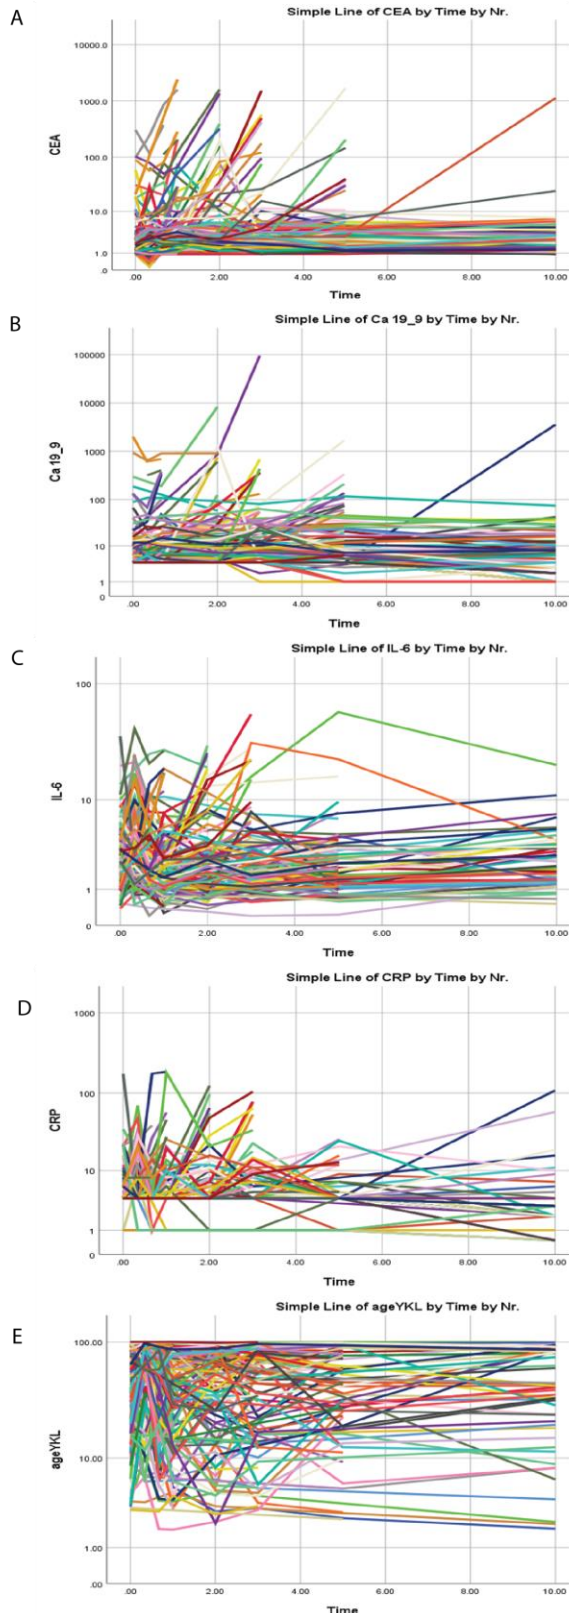

| Biomarker | Time-point                 | Median | Percentile 25 | Percentile 75 |
|-----------|----------------------------|--------|---------------|---------------|
| CEA       | 0 months (postoperative)   | 1.9    | 1.2           | 3.0           |
|           | 4 months (during adjuvant) | 2.6    | 1.8           | 4.2           |
|           | 8 months (post-adjuvant)   | 2.5    | 1.8           | 3.8           |
|           | 12 months                  | 2.8    | 1.9           | 4.7           |
|           | 24 months                  | 2.7    | 2.0           | 4.8           |
|           | 36 months                  | 2.7    | 1.9           | 4.8           |
|           | 60 months                  | 2.7    | 1.6           | 4.7           |
|           | 120 months                 | 2.3    | 1.5           | 3.5           |

| Biomarker | Time-point                 | Median | Percentile 25 | Percentile 75 |
|-----------|----------------------------|--------|---------------|---------------|
| CA19-9    | 0 months (postoperative)   | 4      | 4             | 9             |
|           | 4 months (during adjuvant) | 6      | 4             | 14            |
|           | 8 months (post-adjuvant)   | 6      | 4             | 14            |
|           | 12 months                  | 6      | 4             | 14            |
|           | 24 months                  | 7      | 4             | 16            |
|           | 36 months                  | 8      | 4             | 22            |
|           | 60 months                  | 7      | 4             | 20            |
|           | 120 months                 | 6      | 3             | 12            |

| Biomarker | Time-point                 | Median | Percentile 25 | Percentile 75 |
|-----------|----------------------------|--------|---------------|---------------|
| IL-6      | 0 months (postoperative)   | 2.3    | 1.6           | 3.5           |
|           | 4 months (during adjuvant) | 2.7    | 1.7           | 4.2           |
|           | 8 months (post-adjuvant)   | 1.9    | 1.4           | 3.3           |
|           | 12 months                  | 2.1    | 1.3           | 3.1           |
|           | 24 months                  | 2.1    | 1.3           | 3.5           |
|           | 36 months                  | 2.1    | 1.4           | 3.5           |
|           | 60 months                  | 2.0    | 1.2           | 3.4           |
|           | 120 months                 | 2.3    | 1.4           | 3.7           |

| Biomarker | Time-point                 | Median | Percentile 25 | Percentile 75 |
|-----------|----------------------------|--------|---------------|---------------|
| CRP       | 0 months (postoperative)   | 4      | 4             | 7             |
|           | 4 months (during adjuvant) | 4      | 4             | 7             |
|           | 8 months (post-adjuvant)   | 4      | 4             | 5             |
|           | 12 months                  | 4      | 4             | 5             |
|           | 24 months                  | 4      | 4             | 6             |
|           | 36 months                  | 4      | 4             | 7             |
|           | 60 months                  | 4      | 4             | 4             |
|           | 120 months                 | 3      | 2             | 3             |

| Biomarker | Time-point                 | Median | Percentile 25 | Percentile 75 |
|-----------|----------------------------|--------|---------------|---------------|
| YKL-40    | 0 months (postoperative)   | 65     | 39            | 119           |
|           | 4 months (during adjuvant) | 91     | 57            | 152           |
|           | 8 months (post-adjuvant)   | 71     | 38            | 128           |
|           | 12 months                  | 60     | 37            | 108           |
|           | 24 months                  | 62     | 34            | 125           |
|           | 36 months                  | 63     | 31            | 116           |
|           | 60 months                  | 58     | 39            | 105           |
|           | 120 months                 | 63     | 38            | 124           |

**Figure S1.** Biomarker levels during 10 years of follow-up in each patient: CEA (A), CA 19-9 (B), IL-6 (C), CRP (D), and YKL-40 (E).

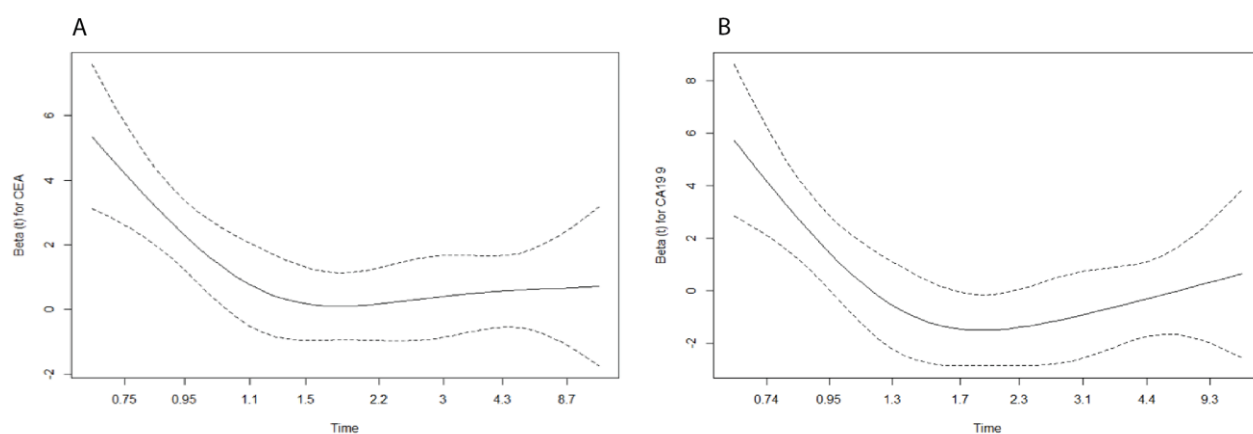

**Figure S2.** Schoenfeld residuals for CEA (A) and CA 19-9 (B) in a modified model for DFS.

**Table S1.** Modified model for DFS of CEA and CA19-9 with the time axis split in two at 12 months: for the first year after primary surgery and for the time after that.

|                                                      | DFS   |               |         |
|------------------------------------------------------|-------|---------------|---------|
|                                                      | HR    | 95% CI for HR | P-value |
| <b>Adjusted*</b>                                     |       |               |         |
| CEA <sup>1</sup> elevated vs. normal for 0-1 year    | 18.50 | 6.34—53.95    | <0.001  |
| CEA <sup>1</sup> elevated vs. normal for >1 year     | 1.19  | 0.26—5.39     | 0.824   |
| CA19-9 <sup>2</sup> elevated vs. normal for 0-1 year | 6.75  | 2.15—21.15    | 0.001   |
| CA19-9 <sup>2</sup> elevated vs. normal >1 year      | 0.26  | 0.04—1.94     | 0.190   |

\* Adjusted with age, sex, inflammatory disease, chemo regimen and TNM stage

<sup>1</sup> n= 130, <sup>2</sup> n= 119

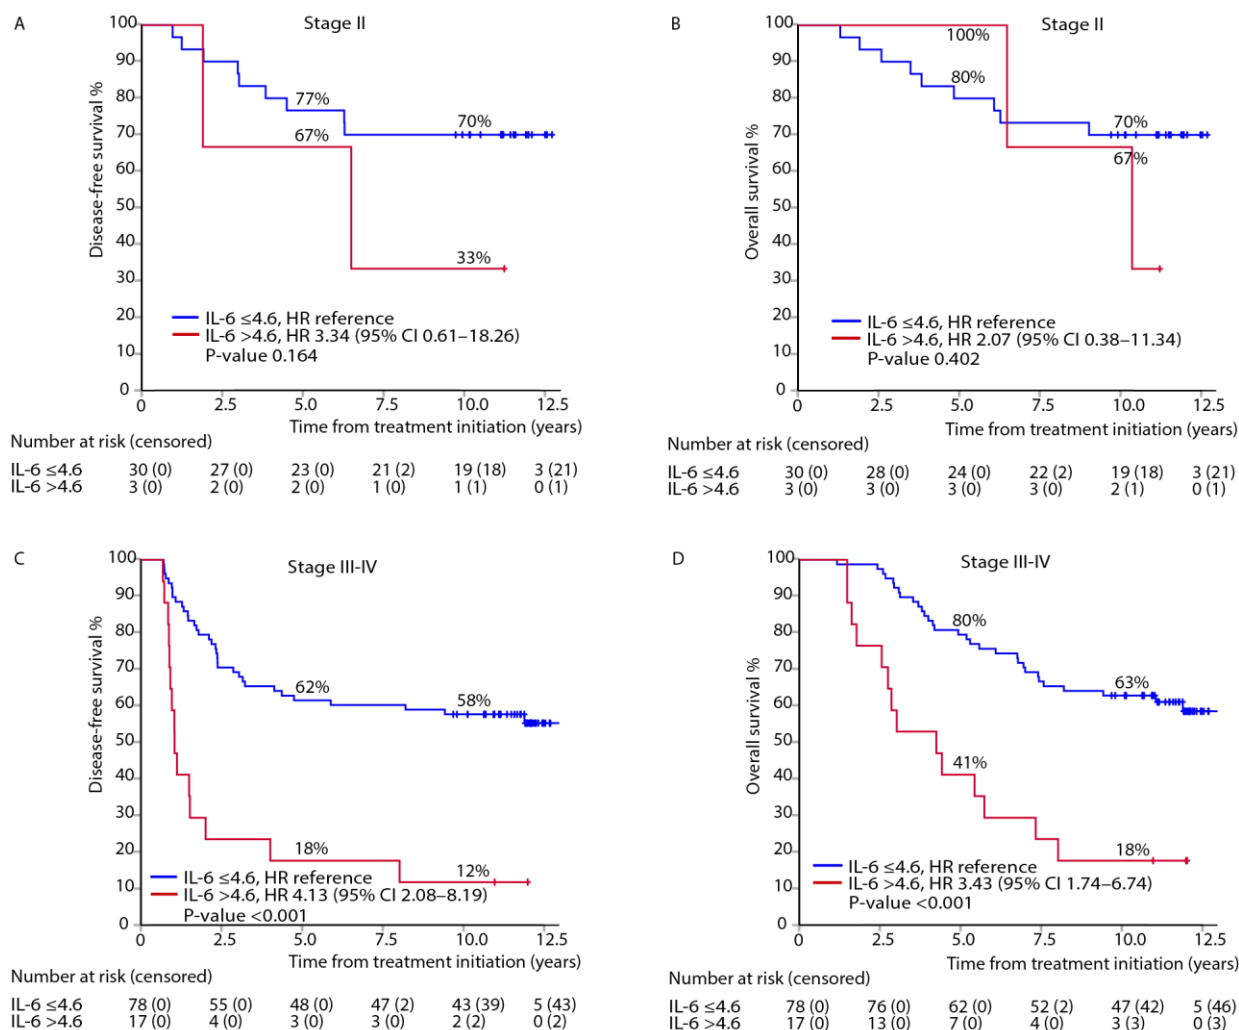

**Figure S3.** Disease-free survival (DFS) and overall survival (OS) after therapy in patients with elevated versus normal IL-6 and TNM stage II (A, B) or III–IV (C, D), adjusted hazard ratios (HR) and 95% confidence intervals (95% CI).

**Table S2. Mutually adjusted, modified model for DFS of CEA and CA19-9 with the time axis was split in two at 12 months: for the first year after primary surgery and for the time after that.**

|                                         | DFS  |               |         |
|-----------------------------------------|------|---------------|---------|
|                                         | HR   | 95% CI for HR | P-value |
| <b>Adjusted with TNM stage, n=112</b>   |      |               |         |
| CEA elevated vs. normal for 0-1 year    | 8.61 | 2.32—31.94    | 0.001   |
| CEA elevated vs. normal for >1 year     | 0.53 | 0.07—3.97     | 0.533   |
| CA19-9 elevated vs. normal for 0-1 year | 6.11 | 1.65—22.64    | 0.007   |
| CA19-9 elevated vs. normal >1 year      | 0.25 | 0.03—1.84     | 0.172   |
| IL-6 elevated vs. normal                | 2.39 | 0.98—5.81     | 0.056   |
| CRP elevated vs. normal                 | 1.41 | 0.50—3.99     | 0.521   |
| YKL-40 elevated vs. normal              | 1.10 | 0.60—2.00     | 0.761   |

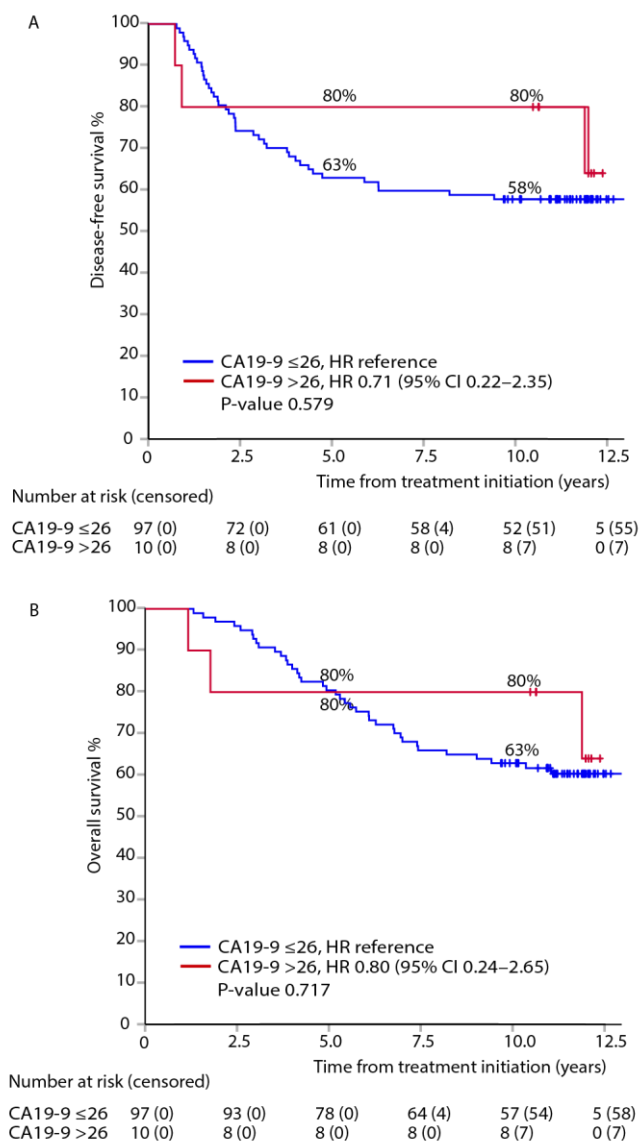

**Figure S4.** Association between elevated CA19-9 and outcomes: DFS (A) and OS (B), in the subgroup of patients with normal post-adjuvant CEA, adjusted hazard ratios (HR) and 95% confidence intervals (95% CI).

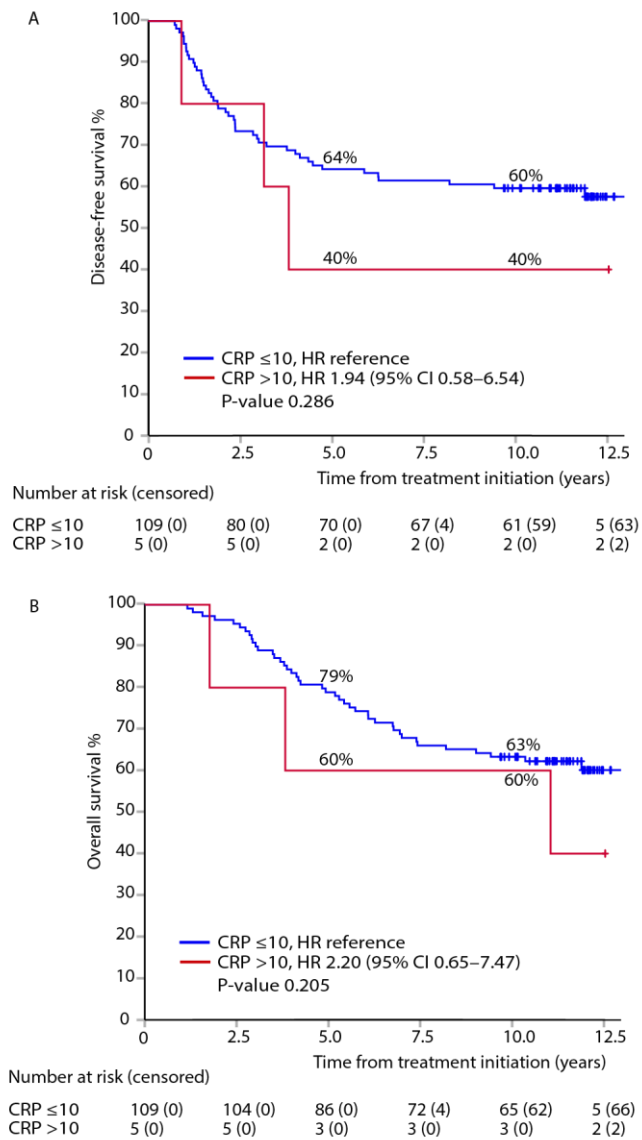

**Figure S5.** Association between elevated CRP and outcomes: DFS (A) and OS (B), in the subgroup of patients with normal post-adjuvant CEA, adjusted hazard ratios (HR) and 95% confidence intervals (95% CI).

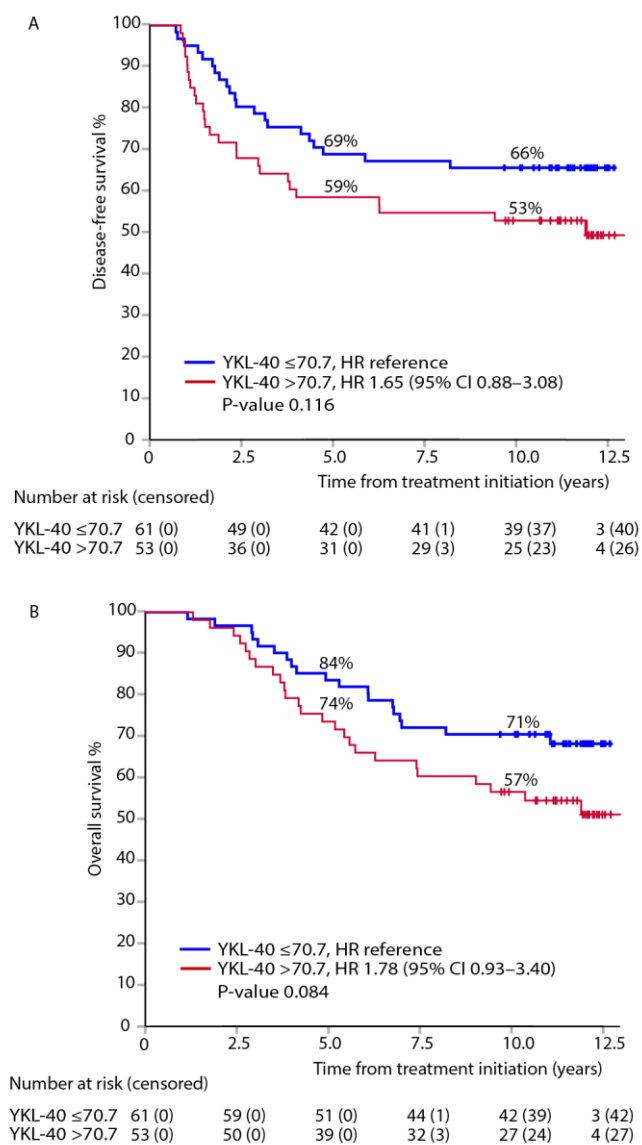

**Figure S6.** Association between elevated YKL-40 and outcomes: DFS (A) and OS (B), in the subgroup of patients with normal post-adjuvant CEA, adjusted hazard ratios (HR) and 95% confidence intervals (95% CI).

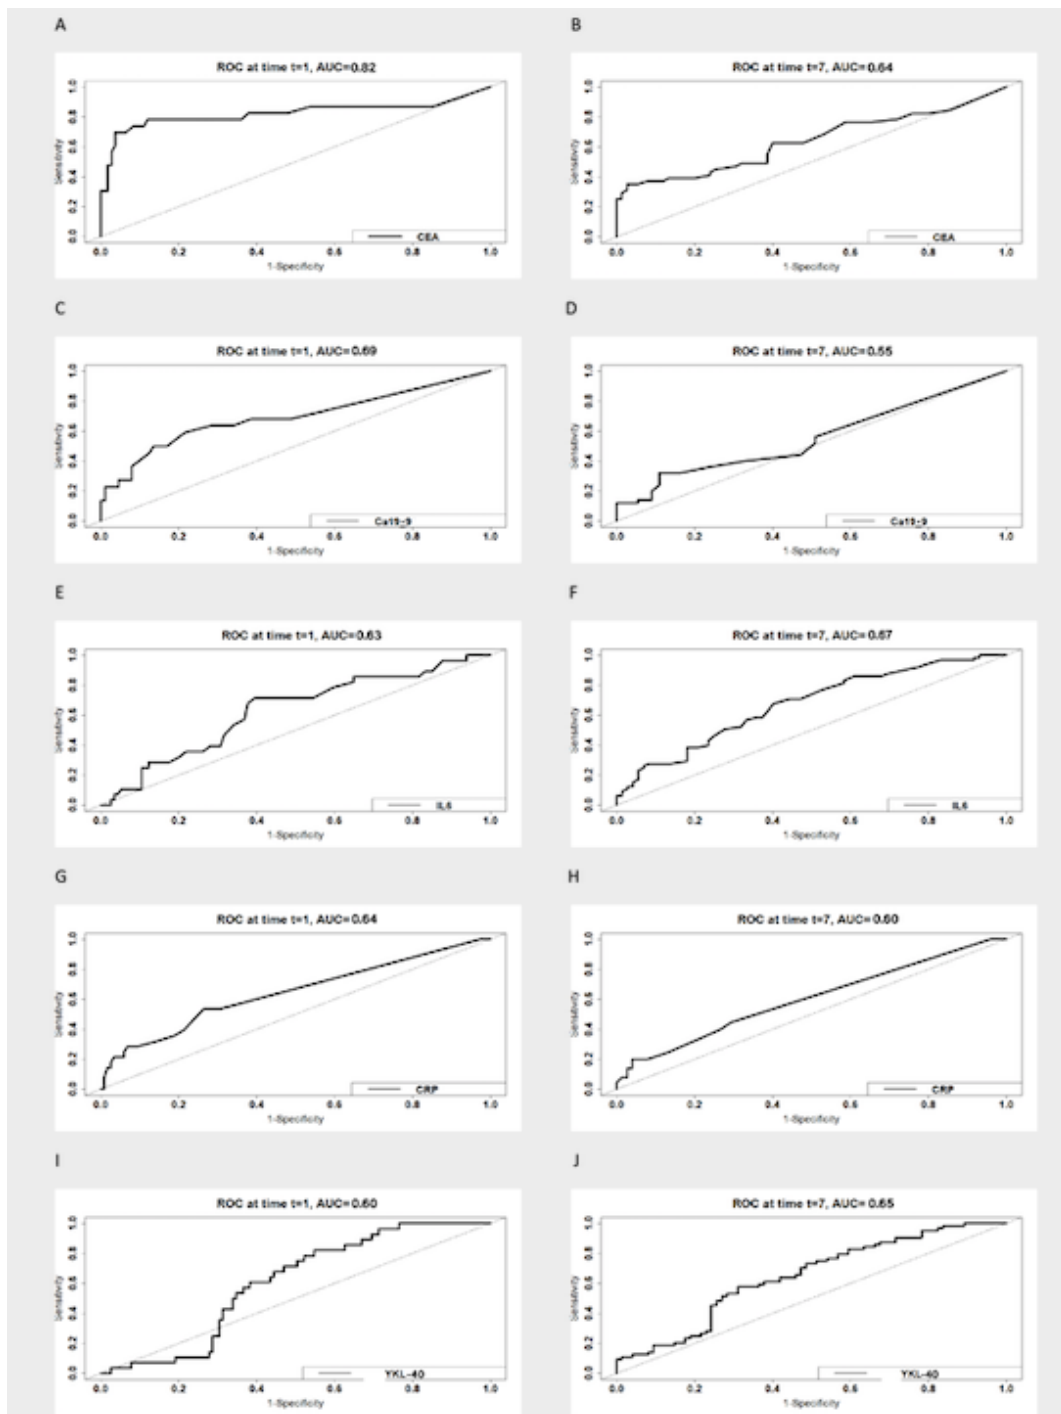

**Figure S7.** ROC curves depicting the accuracy for relapse with non-CRC deaths as competing event, of baseline biomarkers at 1 year (left panels) and 7 years (right panels) after the measurement of CEA (A, B), CA19-9 (C, D), IL-6 (E, F), CRP (G, H), or YKL-40 (I, J).
